# Supplementary material for: Distillation of crop models to learn plant physiology theories using machine learning
Source: PubMed Central journal article supplement (PMC6541271; doi:10.1371/journal.pone.0217075), 2019-05-29
Supplement: pone.0217075.s005.pdf [file pone.0217075.s005.pdf]

|                |                                                              |
|----------------|--------------------------------------------------------------|
| $DVI$          | Developmental index                                          |
| $DVR$          | Developmental rate                                           |
| $Y_G$          | Grain yield                                                  |
| $W_t$          | Total dry matter production                                  |
| $C_s$          | Conversion efficiency of absorbed short-wave radiation       |
| $C_0$          | $C_s$ at 330 ppm                                             |
| $S_s$          | Daily total absorbed radiation [MJ/m <sup>2</sup> ]          |
| $h$            | Harvest index                                                |
| $h_m$          | Maximum harvest index                                        |
| $h_{\gamma_H}$ | Harvest index considering $\gamma_H$                         |
| $h_{\gamma_L}$ | Harvest index considering $\gamma_L$                         |
| $T_{mean}$     | Daily mean temperature [°C]                                  |
| $T_{max}$      | Daily maximum temperature [°C]                               |
| $T_H$          | Average of $T_{max}$ at $0.96 < DVI \leq 1.22$               |
| $T_h$          | Temperature at which $DVR$ is half the maximum rate          |
| $L$            | Day length [h]                                               |
| $L_c$          | Critical day length                                          |
| $P$            | CO <sub>2</sub> concentration [ppm]                          |
| $R_m$          | Asymptotic limit of relative response to CO <sub>2</sub>     |
| $G_v$          | Minimum number of days required for heading                  |
| $G_r$          | Minimum number of days required for the grain-filling period |
| $\gamma$       | Percentage of spikelet sterility                             |
| $\gamma_L$     | $\gamma$ due to cool summer damage                           |
| $\gamma_H$     | $\gamma$ due to high temperature at anthesis                 |
| $\gamma_0$     | Empirical constant                                           |
| $K_h$          | Empirical constant                                           |
| $K_q$          | Empirical constant                                           |
| $K_c$          | Empirical constant                                           |
| $K_r$          | Empirical constant                                           |
| $T_{cr}$       | Empirical constant                                           |
| $A$            | Empirical constant                                           |
| $C$            | Empirical constant                                           |
| $B$            | Empirical constant                                           |
| $t$            | Empirical constant                                           |
