# Supplementary material for: Distillation of crop models to learn plant physiology theories using machine learning
Source: PubMed Central journal article supplement (PMC6541271; doi:10.1371/journal.pone.0217075), 2019-05-29
Supplement: pone.0217075.s006.pdf [file pone.0217075.s006.pdf]

| Noise level       | Training | Validation |
|-------------------|----------|------------|
| $[-0.0, 0.0]$     | 0.000028 | 0.000056   |
| $[-0.1, 0.1]$     | 0.000116 | 0.000415   |
| $[-.001, 0.01]$   | 0.000027 | 0.000057   |
| $[-0.001, 0.001]$ | 0.000030 | 0.000050   |
